# Supplementary material for: Simulation der Letalität nach verschiedenen Ex-ante- und Ex-post-Triage-Verfahren bei Menschen mit Behinderungen und Vorerkrankungen
Source: Springer Nature journal article supplement (doi:10.1007/s00101-023-01302-3), 2023-06-26
Supplement: MOESM1 [file 25537170]

**Zusatzmaterial zum Beitrag „Eine Simulationsstudie zur Evaluation von Ex-ante- und Ex-post-Triage-Politiken unter Berücksichtigung von Überlebenswahrscheinlichkeiten, Beeinträchtigungen und Vorerkrankungen“** von Garber S, Brunner JO, Heller AR et al. (2023) in *Die Anaesthesiologie*.  
 Beitrag und Zusatzmaterial stehen Ihnen auf [www.springermedizin.de](http://www.springermedizin.de) zur Verfügung. Bitte geben Sie dort den Beitragstitel in die Suche ein.

**Tabelle S1: Mortalität (Mittelwert und Standardabweichung) je Patientengruppe und Steuerungspolitik in den betrachteten Zeitpunkten (Realsimulation)**

|                                                  | <i>t</i> | Politik 0      | Politik 1      | Politik 2      | Politik 3      | Politik 4      | Politik 5      |
|--------------------------------------------------|----------|----------------|----------------|----------------|----------------|----------------|----------------|
| Alle Patienten                                   | 0        | 0,35<br>(0,06) | 0,35<br>(0,06) | 0,28<br>(0,06) | 0,28<br>(0,06) | 0,34<br>(0,06) | 0,34<br>(0,06) |
| Patienten ohne<br>Beeinträchtigung/Vorerkrankung | 0        | 0,16<br>(0,08) | 0,16<br>(0,08) | 0,16<br>(0,08) | 0,16<br>(0,08) | 0,16<br>(0,08) | 0,16<br>(0,08) |
| Patienten mit<br>Beeinträchtigung/Vorerkrankung  | 0        | 0,44<br>(0,08) | 0,44<br>(0,08) | 0,35<br>(0,08) | 0,35<br>(0,08) | 0,43<br>(0,08) | 0,43<br>(0,08) |
| Alle Patienten                                   | 1        | 0,35<br>(0,06) | 0,29<br>(0,06) | 0,29<br>(0,06) | 0,25<br>(0,06) | 0,34<br>(0,06) | 0,28<br>(0,06) |
| Patienten ohne<br>Beeinträchtigung/Vorerkrankung | 1        | 0,16<br>(0,09) | 0,16<br>(0,08) | 0,16<br>(0,08) | 0,16<br>(0,08) | 0,16<br>(0,08) | 0,16<br>(0,08) |
| Patienten mit<br>Beeinträchtigung/Vorerkrankung  | 1        | 0,44<br>(0,08) | 0,36<br>(0,08) | 0,36<br>(0,08) | 0,32<br>(0,08) | 0,43<br>(0,06) | 0,35<br>(0,06) |
| Alle Patienten                                   | 2        | 0,35<br>(0,06) | 0,26<br>(0,06) | 0,30<br>(0,06) | 0,23<br>(0,05) | 0,34<br>(0,06) | 0,25<br>(0,06) |
| Patienten ohne<br>Beeinträchtigung/Vorerkrankung | 2        | 0,16<br>(0,09) | 0,16<br>(0,07) | 0,16<br>(0,08) | 0,16<br>(0,07) | 0,16<br>(0,08) | 0,16<br>(0,07) |
| Patienten mit<br>Beeinträchtigung/Vorerkrankung  | 2        | 0,44<br>(0,08) | 0,32<br>(0,08) | 0,37<br>(0,08) | 0,29<br>(0,08) | 0,43<br>(0,08) | 0,31<br>(0,08) |
| Alle Patienten                                   | 3        | 0,35<br>(0,06) | 0,23<br>(0,05) | 0,30<br>(0,06) | 0,22<br>(0,05) | 0,34<br>(0,06) | 0,23<br>(0,05) |
| Patienten ohne<br>Beeinträchtigung/Vorerkrankung | 3        | 0,16<br>(0,09) | 0,16<br>(0,07) | 0,16<br>(0,08) | 0,15<br>(0,07) | 0,16<br>(0,08) | 0,15<br>(0,07) |
| Patienten mit<br>Beeinträchtigung/Vorerkrankung  | 3        | 0,44<br>(0,08) | 0,30<br>(0,08) | 0,37<br>(0,08) | 0,28<br>(0,08) | 0,43<br>(0,08) | 0,29<br>(0,08) |

**Tabelle S2: Durchschnittliche Anzahl an Patienten auf der Intensivstation je Patientengruppe und Steuerungspolitik in den betrachteten Zeitpunkten (Realsimulation)**

|                                                  | <i>t</i> | Politik 0 | Politik 1 | Politik 2 | Politik 3 | Politik 4 | Politik 5 |
|--------------------------------------------------|----------|-----------|-----------|-----------|-----------|-----------|-----------|
| Patienten ohne<br>Beeinträchtigung/Vorerkrankung | 0        | 18,0      | 18,0      | 21,0      | 21,0      | 19,7      | 19,7      |
| Patienten mit<br>Beeinträchtigung/Vorerkrankung  | 0        | 42,0      | 42,0      | 39,0      | 39,0      | 40,3      | 40,3      |
| Patienten ohne<br>Beeinträchtigung/Vorerkrankung | 1        | 18,0      | 20,9      | 20,7      | 23,9      | 19,6      | 22,6      |
| Patienten mit<br>Beeinträchtigung/Vorerkrankung  | 1        | 42,0      | 39,1      | 39,3      | 36,1      | 40,5      | 37,4      |
| Patienten ohne<br>Beeinträchtigung/Vorerkrankung | 2        | 18,0      | 23,8      | 20,4      | 26,6      | 19,4      | 25,6      |
| Patienten mit<br>Beeinträchtigung/Vorerkrankung  | 2        | 42,0      | 36,2      | 39,6      | 33,4      | 40,6      | 34,5      |
| Patienten ohne<br>Beeinträchtigung/Vorerkrankung | 3        | 18,0      | 26,6      | 20,2      | 29,0      | 19,2      | 28,3      |
| Patienten mit<br>Beeinträchtigung/Vorerkrankung  | 3        | 42,0      | 33,4      | 39,8      | 31,0      | 40,8      | 31,7      |
